# The stratification of major depressive disorder into genetic subgroups

David M. Howard<sup>\*1</sup>, Toni-Kim Clarke<sup>1</sup>, Mark J. Adams<sup>1</sup>, Jonathan D. Hafferty<sup>1</sup>, Eleanor M. Wigmore<sup>1</sup>, Yanni Zeng<sup>1,2</sup>, Lynsey S. Hall<sup>1</sup>, Jude Gibson<sup>1</sup>, Thibaud S. Boutin<sup>2</sup>, Caroline Hayward<sup>2,8</sup>, Pippa A. Thomson<sup>3,4</sup>, David J. Porteous<sup>3</sup>, Blair H. Smith<sup>5,8</sup>, Alison D. Murray<sup>6,8</sup>, Major Depressive Disorder Working Group of the Psychiatric GWAS Consortium<sup>†</sup>, Chris S. Haley<sup>2</sup>, Ian J. Deary<sup>4,7,8</sup>, Heather C. Whalley<sup>1</sup> and Andrew M. McIntosh<sup>1,7,8</sup>

## Affiliations:

<sup>1</sup>Division of Psychiatry, University of Edinburgh, Royal Edinburgh Hospital, Edinburgh, UK

<sup>2</sup>Medical Research Council Human Genetics Unit, Institute of Genetics and Molecular Medicine, University of Edinburgh, Edinburgh, UK

<sup>3</sup>Centre for Genomic and Experimental Medicine, Institute of Genetics and Molecular Medicine, University of Edinburgh, Edinburgh, UK

<sup>4</sup>Centre for Cognitive Ageing and Cognitive Epidemiology, University of Edinburgh, Edinburgh, UK

<sup>5</sup>Division of Population Health Sciences, University of Dundee, Dundee, UK

<sup>6</sup>Aberdeen Biomedical Imaging Centre, University of Aberdeen, Aberdeen, UK

<sup>7</sup>Department of Psychology, The University of Edinburgh, Edinburgh, UK

<sup>8</sup>Generation Scotland, Institute of Genetics and Molecular Medicine, University of Edinburgh, Edinburgh, UK

<sup>†</sup>Consortium members and their affiliations are listed in supplementary information

<sup>\*</sup>Corresponding author: David M. Howard

Division of Psychiatry, University of Edinburgh, Royal Edinburgh Hospital, Edinburgh, UK

+44 131 537 6268

(e-mail: D.Howard@ed.ac.uk)

40 **Major depressive disorder (MDD) is a heritable condition ( $h^2 = 37\%$ )<sup>1</sup> and a leading cause of**  
 41 **disability worldwide<sup>2</sup>. MDD is clinically heterogeneous and comorbid with a variety of**  
 42 **conditions and it has been hypothesised that this causal heterogeneity may have confounded**  
 43 **previous attempts to elucidate its genetic architecture<sup>3-5</sup>. We applied a relatively new technique,**  
 44 **Buhmbox<sup>6</sup>, to identify the presence of heterogeneous sub-groups within MDD using summary**  
 45 **data from genome-wide association studies. We analysed two independent cohorts ( $n_{\text{total}} =$**   
 46 **31,981) and identified significant evidence ( $P_{\text{corrected}} < 0.05$ ) for 10 sub-groups across both**  
 47 **cohorts, including subgroups with a liability for migraine, alcohol consumption and eczema.**  
 48 **The most notable subgroups ( $P_{\text{corrected}} \leq 2.57 \times 10^{-8}$  in both cohorts) were for blood levels of**  
 49 **cholesterol and triglycerides, and blood pressure, indicating subgroups within MDD cases of**  
 50 **individuals with a genetic predisposition for anomalous levels of these metabolic traits. Our**  
 51 **findings provide strong evidence for novel causal heterogeneity of MDD and identify avenues**  
 52 **for both stratification and treatment.**

53 MDD is a complex and clinically heterogeneous condition that is characterised by symptoms  
 54 including low mood and/or anhedonia persisting for at least two weeks. Many unique combinations of  
 55 symptoms may lead to the same diagnosis and it has been suggested that this symptomatic  
 56 heterogeneity may be due to, as yet unproven, causal heterogeneity<sup>7</sup>. In support of the causal  
 57 heterogeneity hypothesis, MDD is frequently observed to be comorbid with many diseases including  
 58 cancer<sup>8</sup>, cardiovascular disease,<sup>9</sup> and other psychiatric illnesses<sup>10,11</sup>.

59 We sought to test the presence of causal heterogeneity in MDD according to a number of disease and  
 60 quantitative traits using a newly available tool, Buhmbox<sup>6</sup>. Buhmbox examines the weighted pairwise  
 61 correlations of the risk allele dosages for these diseases and traits within MDD cases and controls,  
 62 based on effect size and frequency, and assigns a  $P$ -value based on the likelihood of the observed  
 63 correlations between the cases and controls. We used two cohort studies, Generation Scotland:  
 64 Scottish Family Health Study (GS:SFHS)<sup>12</sup> and UK Biobank<sup>13</sup>, both of which have whole-genome  
 65 genotyping data and information relating to MDD status. Study demographics for each cohort are  
 66 provided in **Table 1**. Within each cohort, we examined 34 traits with a reported comorbidity with

MDD and tested whether evidence of subgroups for these traits could be detected within our MDD cases. Further information regarding the 34 traits and their sources is provided in **Supplementary Table 1**. For the traits anorexia nervosa, neuroticism and MDD, summary statistics from different publications were assessed and are numbered accordingly, i.e. MDD 1, MDD 2 and MDD 3. In the case of MDD, this allowed us to examine whether different sets of associated loci, drawn from different populations and diagnostic criteria for MDD, would form a heterogeneous subgroup within our GS:SFHS and/or UK Biobank MDD cases.

**Table 1.** Study demographics of Generation Scotland: Scottish Family Health Study (GS:SFHS) and UK Biobank

|                         | GS:SFHS       | UK Biobank      |
|-------------------------|---------------|-----------------|
| N                       | 6,946         | 25,035          |
| Age range               | 19 - 93       | 40 - 79         |
| Mean age in years (S.D) | 51.5 (13.2)   | 57.8 (8.0)      |
| Males / Females         | 3,013 / 3,933 | 12,528 / 12,507 |
| MDD Cases / Controls    | 975 / 5,971   | 8,508 / 16,527  |

To account for multiple testing, *P*-values were adjusted using a false discovery rate adjustment and all reported values have been adjusted<sup>14</sup>. Ten traits showed significant evidence (*P* < 0.05) of MDD subgroup heterogeneity across both cohorts: total HDL cholesterol levels, total LDL cholesterol levels, serum triglycerides levels, diastolic blood pressure, systolic blood pressure, pulse pressure, alcohol consumption, migraine, eczema and MDD 3. Four traits: Alzheimer's disease, neuroticism, schizophrenia and being a 'morning person' were identified as stratifying traits within one, but not both, cohorts. The subgroup heterogeneity *P*-values obtained within each cohort and for each trait are shown in **Table 2** and **Figure 1**.

**Table 2.** The false discovery rate adjusted *P*-values for subgroup heterogeneity of the shown disease or quantitative trait within MDD for Generation Scotland: Scottish Family Health Study (GS:SFHS) and UK Biobank. Bold values indicate statistical significance (*P* < 0.05).

|                     | GS:SFHS                       | UK Biobank                     |
|---------------------|-------------------------------|--------------------------------|
| Height              | 0.657                         | 0.141                          |
| Overweight          | 0.693                         | 0.876                          |
| Type 2 Diabetes     | 0.587                         | 0.854                          |
| Alcohol Consumption | <b>2.29 x 10<sup>-4</sup></b> | <b>9.37 x 10<sup>-16</sup></b> |
| Cognition           | 0.387                         | 0.361                          |
| Alzheimer's Disease | <b>0.006</b>                  | 0.361                          |

|                            |                                |                                 |
|----------------------------|--------------------------------|---------------------------------|
| Parkinson's Disease        | 0.851                          | 0.854                           |
| Sleep Duration             | 0.806                          | 0.876                           |
| Morning Person             | 0.300                          | <b>0.010</b>                    |
| Anorexia Nervosa 1         | 0.851                          | 0.781                           |
| Anorexia Nervosa 2         | 0.545                          | 0.588                           |
| Migraine                   | <b>3.08 x 10<sup>-5</sup></b>  | <b>5.30 x 10<sup>-10</sup></b>  |
| Crohn's Disease            | 0.443                          | 0.606                           |
| Inflammatory Bowel Disease | 0.651                          | 0.280                           |
| Asthma                     | 0.587                          | 0.264                           |
| Eczema                     | <b>6.56 x 10<sup>-3</sup></b>  | <b>2.49 x 10<sup>-5</sup></b>   |
| Rheumatoid Arthritis       | 0.918                          | 0.174                           |
| HDL Cholesterol            | <b>4.09 x 10<sup>-14</sup></b> | <b>1.14 x 10<sup>-22</sup></b>  |
| LDL Cholesterol            | <b>4.91 x 10<sup>-16</sup></b> | <b>1.04 x 10<sup>-55</sup></b>  |
| Triglycerides              | <b>2.57 x 10<sup>-8</sup></b>  | <b>1.94 x 10<sup>-59</sup></b>  |
| Diastolic Blood Pressure   | <b>1.48 x 10<sup>-26</sup></b> | <b>3.84 x 10<sup>-162</sup></b> |
| Systolic Blood Pressure    | <b>1.84 x 10<sup>-15</sup></b> | <b>5.07 x 10<sup>-27</sup></b>  |
| Pulse Blood Pressure       | <b>3.36 x 10<sup>-11</sup></b> | <b>1.90 x 10<sup>-53</sup></b>  |
| Coronary Artery Disease    | 0.443                          | 0.086                           |
| Anxiety Disorder           | 0.693                          | 0.602                           |
| Autism Spectrum Disorder   | 0.443                          | 0.648                           |
| Extraversion               | 0.784                          | 0.606                           |
| Neuroticism 1              | 0.918                          | 0.102                           |
| Neuroticism 2              | 0.081                          | <b>3.20 x 10<sup>-15</sup></b>  |
| Bipolar Disorder           | 0.453                          | 0.189                           |
| Schizophrenia              | 0.117                          | <b>1.13 x 10<sup>-12</sup></b>  |
| MDD 1                      | 0.851                          | 0.588                           |
| MDD 2                      | 0.851                          | 0.073                           |
| MDD 3                      | <b>0.023</b>                   | <b>0.004</b>                    |

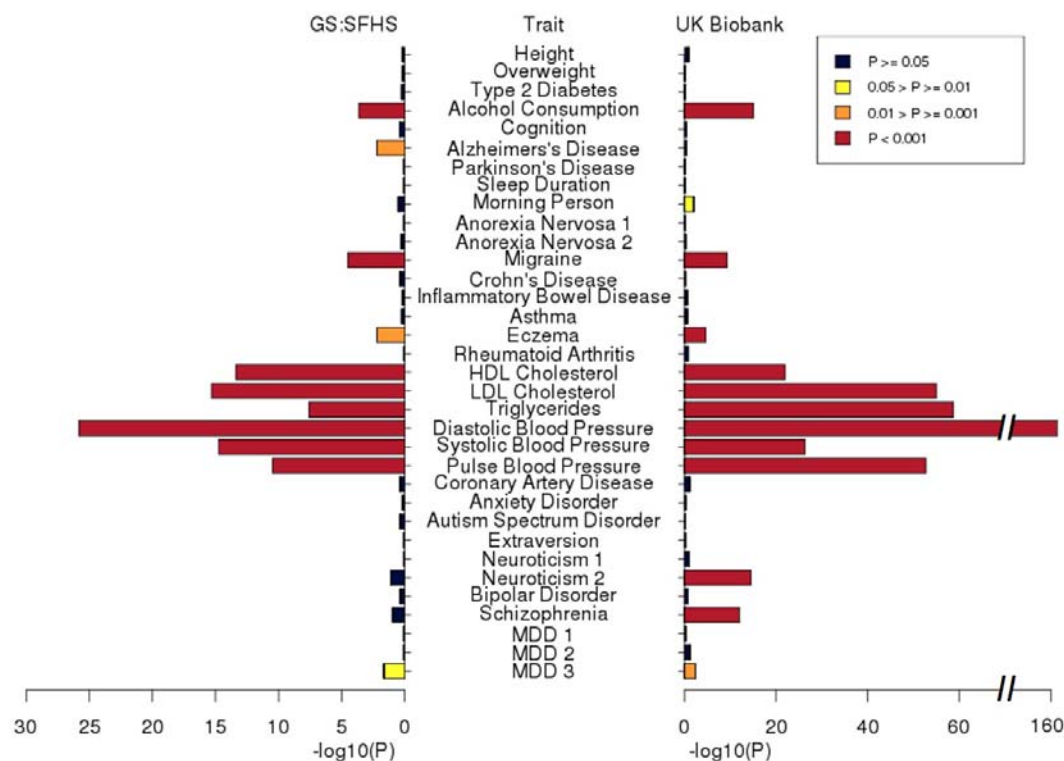

**Figure 1.** The false discovery rate adjusted  $P$ -values for evidence of subgroup heterogeneity of the shown disease or quantitative trait within MDD for both Generation Scotland: Scottish Family Health Study (GS:SFHS;  $n = 6,946$ ) and UK Biobank ( $n = 25,035$ ).

The most striking results were those relating to metabolic traits ( $P \leq 2.57 \times 10^{-8}$  across both cohorts). Although these traits are unlikely to be independent of one another, the statistical significance obtained across both studies suggest robust subgroup heterogeneity. Buhmbox does not identify the individuals within the subgroup and future work to address this would aid in determining the degree of overlap between the observed  $P$ -values. Milaneschi, et al.<sup>15</sup> also reported evidence of a genetic correlation using profile risk scores between triglycerides and a severe atypical MDD subgroup and it would be beneficial to examine the blood pressure and cholesterol traits in other populations, social, economic and health care settings. Although elevated blood pressure and cholesterol levels are positively correlated with coronary artery disease (CAD), no evidence ( $P \geq 0.05$ ) for a subgroup for CAD was found. This apparent anomaly merits further study, but may reflect stratification independent of CAD.

There is substantial comorbidity between alcohol abuse and MDD<sup>16</sup> with studies demonstrating a bidirectional relationship between alcohol and depression<sup>17,18</sup>. Both cohorts used in our study provided evidence ( $P < 0.05$ ) of a novel alcohol consumption subgroup within MDD. Ellingson, et al.<sup>19</sup> have suggested that negative emotionality and behavioral control may mediate the genetic overlap between alcohol consumption and MDD. Further work could examine whether the subgroups within our MDD cases could also possess loci that influence those mediatory factors.

Similarly to alcohol consumption, migraine has also been shown to have a bidirectional relationship with depression<sup>20</sup>. We found evidence ( $P < 0.05$ ) of subgroup heterogeneity within MDD that had a genetic predisposition for migraine in both of the cohorts that we studied. Ours is the first study to report the existence of a heterogeneous subgroup within MDD cases of individuals with a migraine-like genetic profile.

Subgroup heterogeneity for MDD was observed ( $P < 0.05$ ) in both GS:SFHS and UK Biobank for the MDD 3 trait obtained from Hyde, et al.<sup>21</sup>. MDD 3 was based on a self-reported diagnosis of MDD within a large and predominately European population. The diagnosis of MDD within UK Biobank was also self-reported and the existence of an MDD 3 subgroup suggests that there is a common shared genetic basis to this phenotype, but that it was not shared across all cases. MDD 1 was extracted from a study examining recurrent depression in Han Chinese women within a hospital setting and although we didn't find evidence of a subgroup ( $P \geq 0.05$ ), this was not completely unexpected within our population and UK-based cohorts. No evidence ( $P \geq 0.05$ ) was found for a MDD 2 subgroup, however a polygenic risk score approach has provided evidence of pleiotropy between MDD 2 cases and GS:SFHS cases ( $P < 1.37 \times 10^{-10}$ ) and MDD 2 cases and UK Biobank cases ( $P < 1.92 \times 10^{-8}$ ), Hall, et al., (manuscript in preparation).

The body's inflammatory response has been highlighted as a potential contributor to depression<sup>22</sup>. Crohn's disease, inflammatory bowel disease and asthma were examined, but neither cohort provided evidence ( $P \geq 0.05$ ) for subgroup heterogeneity. Asthma is frequently comorbid with eczema and both cohorts examined in our study provided evidence ( $P < 0.05$ ) for a subgroup of individuals with a genetic predisposition for eczema within our MDD cases. Associations between eczema and

depression are well reported in the literature and potentially mediated by health anxiety<sup>23</sup>. Chronic inflammation seen in some cases of eczema, and a growing appreciation for the importance of inflammation in depression, provides another possible explanation for subgroup heterogeneity.

A degree of cognitive impairment has been reported in individuals that are currently experiencing a depressive episode<sup>24,25</sup>. However, we found no evidence ( $P \geq 0.05$ ) for MDD subgroup heterogeneity for general fluid cognitive ability. Alzheimer's disease is also associated with a decline in cognitive ability and previous studies have demonstrated depression to be a risk factor for the disease<sup>26,27</sup>. Within GS:SFHS, there was evidence ( $P = 0.006$ ) for a subgroup of MDD cases which harboured the loci associated with Alzheimer's disease, however this was not replicated in UK Biobank ( $P \geq 0.05$ ). Parkinson's disease is another condition that is associated with neuropathology that is more likely to occur later in life. We found no evidence ( $P \geq 0.05$ ) in either cohort for a subgroup of Parkinson's disease within MDD cases.

Subgroup heterogeneity was observed ( $P = 1.13 \times 10^{-12}$ ) in UK Biobank for schizophrenia which substantiates the work of Milaneschi, et al.<sup>7</sup> who demonstrated correlated genomic profile risk scores between schizophrenia and a severe typical MDD subtype. However, Han, et al.<sup>6</sup> and our GS:SFHS cohort provided no evidence ( $P > 0.05$ ) of a schizophrenia subgroup within MDD cases, which suggests that evidence of subgroup heterogeneity for schizophrenia is population and/or diagnosis dependent.

We also examined a number of developmental and personality traits due to the impact that depression can have on social interaction and feelings of self-worth. Evidence of subgroup heterogeneity ( $P = 3.20 \times 10^{-15}$ ) was only found within UK Biobank for neuroticism 2 drawn from the Smith, et al.<sup>28</sup> study. The neuroticism 2 trait had a much greater number of associated loci compared to neuroticism 1 and therefore neuroticism 1 may have been underpowered to detect an effect, but this is also dependent on the effect sizes of the associated loci, the number of MDD cases and the size of any subgroup. There are similarities in the way that individuals respond to stressful events between neuroticism and MDD and it may be the heritable component that underpins this response that is driving the observed subgrouping within UK Biobank.

The diagnosis of MDD within GS:SFHS was based on the DSM-IV criteria<sup>29</sup>, which includes questions related to sleep and eating patterns. Therefore, sleep duration, being a ‘morning person’ and anorexia nervosa were included in our study. However, it was only within UK Biobank that a significant *P*-value for being a ‘morning person’ ( $P = 0.010$ ) was observed. Anorexia nervosa 1 and 2 and sleep duration had low numbers of associated loci available (**Supplementary Table 1**) and were potentially underpowered to detect an effect.

Rheumatoid Arthritis (RA) is an autoimmune disease which, like many other chronic diseases, has been shown in multiple studies to be comorbid with depression<sup>30,31</sup>, with a potential subgroup of depressed individuals within RA sufferers<sup>32</sup>. However, no evidence ( $P \geq 0.05$ ) of subgroup heterogeneity was found for RA within either GS:SFHS or UK Biobank MDD cases. Multiple studies have suggested that morphological traits<sup>33,34</sup> and type 2 diabetes<sup>35</sup> may identify subgroups of individuals with MDD, but we found no evidence ( $P \geq 0.05$ ) for subgroup heterogeneity according to these traits in the current study.

The two cohorts used in this study reflect a subsample of the UK population, with additional steps taken to ensure that there were no overlapping individuals. An MDD diagnosis was made using a structured clinical interview within GS:SFHS, whereas UK Biobank cases were defined by a number of self-reported measures. A broad range of traits were assessed and the selection of the summary statistics used was based on the number of individuals analysed, the availability of summary statistics and publication date. Buhmbox measures the correlations within cases, which is independent (or orthogonal) information from the effect size (personal communication with Buhm Han). Therefore, UK Biobank was able to be used to obtain the summary statistics for neuroticism 2, alcohol consumption and the blood pressure traits, and then also used to assess the existence of MDD subgroup heterogeneity.

Multiple studies have suggested the presence of aetiology subgroups within MDD and Buhmbox provides a quantifiable measure of their existence. Our study has provided replicable evidence of novel subgroup heterogeneity within MDD for a range of disease and quantitative traits, including blood pressure, cholesterol and triglyceride levels, migraine, eczema and alcohol consumption. This



research underlines the potential of using genomic data for developing stratified approaches to the diagnosis and treatment of depression.

# COMPETING FINANCIAL INTERESTS

The authors declare that no competing financial interests exist.

# ACKNOWLEDGEMENTS

Please refer to the supplementary information for full acknowledgments.

# AUTHOR CONTRIBUTIONS

AMMcI, DJP, BHS, ADM, IJD and CH were involved in the acquisition of the GS:SFHS cohort. Quality control of the GS:SFHS data was conducted by LSH, JDH, MJA, CH and DHM. Imputation of the GS:SFHS data was conducted by TB and CH. Quality control of the UK Biobank data was conducted by MJA and DHM. AMMcI and DMH conceived the initial design of the study with HCW, JDH, YZ, T-KC, MJA, EMW, JG, PAT, CSH, IJD and DJP involved in the ongoing development of the project. DMH conducted the analysis and wrote the paper and all authors have read and approved its submission.

209

210

211 Methods

212 Generation Scotland: Scottish Family Health Study (GS:SFHS)

213 The family and population-based Generation Scotland: Scottish Family Health Study (GS:SFHS)  
 214 cohort<sup>12</sup> consisted of 23,960 individuals, of whom 20,195 were genotyped with the Illumina  
 215 OmniExpress BeadChip (706,786 SNPs). The genotypic data was uploaded to the Michigan  
 216 Imputation Server<sup>36</sup> and phased using SHAPE IT v2.r837<sup>37</sup> and imputed using the Haplotype  
 217 Reference Consortium reference panel (HRC.r1-1)<sup>38</sup>. The imputation of GS:SFHS has been published  
 218 previously<sup>39</sup>. We applied an imputation accuracy threshold (info score) of  $\geq 0.8$  and this provided us  
 219 with a total of 8,633,288 genome-wide variants calls for 20,032 individuals.

220 A diagnosis of MDD was made using two initial screening questions and the Structured Clinical  
 221 Interview for the Diagnostic and Statistical Manual of Mental Disorders (SCID)<sup>29</sup>. The diagnosis of  
 222 MDD within GS:SFHS has been described previously<sup>40</sup> and in our study, MDD was defined by at  
 223 least one instance of a major depressive episode. Further to this, we used record linkage to the  
 224 Scottish Morbidity Record<sup>41</sup> to examine the psychiatric history of both case and control individuals.  
 225 We identified 1,072 control individuals who had attended at least one psychiatry outpatient clinic and  
 226 we excluded these individuals from our study. Using the psychiatric inpatient records, we identified  
 227 47 MDD cases who were also diagnosed with bipolar disorder or schizophrenia and these individuals  
 228 were also excluded from our study. These participants provided us with prior consent for their  
 229 anonymised data to be linked to clinical data. As GS:SFHS was a family-based cohort, we created an  
 230 unrelated subsample using GCTA v.1.22<sup>42</sup> ensuring that no two individuals shared a genomic  
 231 relatedness of  $\geq 0.025$ . A further 186 individuals who were identified as population outliers through  
 232 principal component analyses of their genotypic information<sup>43</sup>. This left a total of 975 MDD cases and  
 233 5,971 controls (14.0% prevalence) in the GS:SFHS cohort.

234 UK Biobank

The population-based UK Biobank<sup>13</sup> (provided as part of project #4844) consisted of 152,249 individuals with genomic data for 72,355,667 imputed variants<sup>44</sup>. This was the standard data release available to all approved researchers of UK Biobank. Detailed information regarding the imputation procedure<sup>45</sup> and initial quality control<sup>46</sup> are provided elsewhere. In summary, phasing was achieved using a modified version of SHAPE IT 2<sup>47</sup> with a combined reference panel of 1,000 genomes phase 3 and the UK10K haplotype reference<sup>48</sup> panels and the IMPUTE2 package<sup>49</sup> used for imputation. We applied an info score threshold of  $\geq 0.8$  which left a total of 24,467,210 variants. We removed individuals listed as non-white British and those individuals that had also participated in GS:SFHS identified using a checksum approach<sup>50</sup> using genotype data.

Of the remaining participants, 25,035 had completed a touchscreen assessment of depressive symptoms and previous treatment. We used the diagnostic definitions of Smith, et al.<sup>51</sup> and defined case status as either ‘probable single lifetime episode of major depression’ or ‘probable recurrent major depression (moderate and severe)’ and with control status defined as ‘no mood disorder’. This provided us with a total of 8,508 cases and 16,527 controls (34.0% prevalence) within UK Biobank, which is greater than that observed within GS:SFHS.

## Statistical Approach

Buhmbox v0.33<sup>6</sup> was used to conduct the statistical analysis and this package requires raw genetic and phenotypic data (disease A) and also summary statistics relating to the additional disease and quantitative traits for testing (disease B). The disease B associated loci were drawn from either published material or from personal communications and are detailed in **Supplementary Table 1**. The pruning of disease B associated loci was conducted using Plink 1.90<sup>52</sup> and the --indep-pairwise command. A 50 variant window with a 5 variant sliding window was applied to the summary statistics and pruned any variants with an  $r^2 > 0.1$ .

For GS:SFHS the first 20 principal components were derived from the genotypic data using GCTA v1.22<sup>42</sup> and these were fitted within Buhmbox to account for population stratification. For UK Biobank the first 15 genetic principal components<sup>53</sup> were fitted. Buhmbox examines whether there is a

sharing of risk alleles between the disease B associated loci and the disease A cases (in our case MDD). Buhmbox uses the positive correlations between risk allele dosages in disease A cases to determine whether any sharing of risk alleles is driven by all individuals (pleiotropy) or by a subset of individuals (heterogeneity). The likelihood of observing such positive correlations are used to determine the reported *P*-values. The Buhmbox software and manual is freely downloadable from <http://software.broadinstitute.org/mpg/buhmbox/>. The data that support the findings of this study are available on reasonable request from the corresponding author, DMH. The data are not publicly available due to participant confidentiality and the terms of the existing mutual transfer agreements with the respective data repositories.

1. Sullivan, P.F., Neale, M.C. & Kendler, K.S. Genetic epidemiology of major depression: review and meta-analysis. *American Journal of Psychiatry* **157**, 1552-1562 (2000).
2. World Health Organization. Mental health action plan 2013 - 2020. (2013).
3. Flint, J. & Kendler, Kenneth S. The genetics of major depression. *Neuron* **81**, 484-503 (2014).
4. Levinson, D.F. *et al.* Genetic studies of major depressive disorder: why are there no genome-wide association study findings and what can we do about it? *Biological Psychiatry* **76**, 510-512 (2014).
5. Lubke, G.H. *et al.* Genome-wide analyses of borderline personality features. *Molecular Psychiatry* **19**, 923-929 (2014).
6. Han, B. *et al.* A method to decipher pleiotropy by detecting underlying heterogeneity driven by hidden subgroups applied to autoimmune and neuropsychiatric diseases. *Nature Genetics* **48**, 803-810 (2016).
7. Milaneschi, Y. *et al.* Polygenic dissection of major depression clinical heterogeneity. *Molecular Psychiatry* **21**, 516-522 (2016).
8. Walker, J. *et al.* Prevalence, associations, and adequacy of treatment of major depression in patients with cancer: a cross-sectional analysis of routinely collected clinical data. *The Lancet Psychiatry* **1**, 343-350 (2014).
9. Hare, D.L., Toukhsati, S.R., Johansson, P. & Jaarsma, T. Depression and cardiovascular disease: a clinical review. *European Heart Journal*, 1365-1372 (2013).
10. Häfner, H., Löffler, W., Maurer, K., Hambrecht, M. & an der Heiden, W. Depression, negative symptoms, social stagnation and social decline in the early course of schizophrenia. *Acta Psychiatrica Scandinavica* **100**, 105-118 (1999).
11. Avenevoli, S., Swendsen, J., He, J.-P., Burstein, M. & Merikangas, K. Major depression in the national comorbidity survey- adolescent supplement: prevalence, correlates, and treatment. *Journal of the American Academy of Child and Adolescent Psychiatry* **54**, 37-44. e2 (2015).
12. Smith, B.H. *et al.* Cohort profile: Generation Scotland: Scottish Family Health Study (GS:SFHS). The study, its participants and their potential for genetic research on health and illness. *International Journal of Epidemiology* **42**, 689-700 (2013).

- 300 13. Allen, N.E., Sudlow, C., Peakman, T. & Collins, R. UK biobank data: come and get it. *Science*  
301 *Translational Medicine* **6**, 224ed4 (2014).
- 302 14. Benjamini, Y. & Hochberg, Y. Controlling the false discovery rate: a practical and powerful  
303 approach to multiple testing. *Journal of the Royal Statistical Society. Series B*  
304 *(Methodological)* **57**, 289-300 (1995).
- 305 15. Milaneschi, Y. *et al.* Polygenic dissection of major depression clinical heterogeneity. *Mol*  
306 *Psychiatry* **21**, 516-522 (2016).
- 307 16. Grant, B.F., Stinson, F.S., Dawson, D.A. & *et al.* Prevalence and co-occurrence of substance  
308 use disorders and independent mood and anxiety disorders: Results from the national  
309 epidemiologic survey on alcohol and related conditions. *Archives of General Psychiatry* **61**,  
310 807-816 (2004).
- 311 17. Brière, F.N., Rohde, P., Seeley, J.R., Klein, D. & Lewinsohn, P.M. Comorbidity between major  
312 depression and alcohol use disorder from adolescence to adulthood. *Comprehensive*  
313 *Psychiatry* **55**, 526-533 (2014).
- 314 18. Flensburg-Madsen, T. *et al.* Comorbidity and temporal ordering of alcohol use disorders and  
315 other psychiatric disorders: results from a Danish register-based study. *Comprehensive*  
316 *Psychiatry* **50**, 307-314 (2009).
- 317 19. Ellingson, J.M., Richmond-Rakerd, L.S., Statham, D.J., Martin, N.G. & Slutske, W.S. Most of  
318 the genetic covariation between major depressive and alcohol use disorders is explained by  
319 trait measures of negative emotionality and behavioral control. *Psychological Medicine* **46**,  
320 2919-2930 (2016).
- 321 20. Breslau, N., Lipton, R.B., Stewart, W.F., Schultz, L.R. & Welch, K.M.A. Comorbidity of  
322 migraine and depression: Investigating potential etiology and prognosis. *Neurology* **60**, 1308-  
323 1312 (2003).
- 324 21. Hyde, C.L. *et al.* Identification of 15 genetic loci associated with risk of major depression in  
325 individuals of European descent. *Nature Genetics* **48**, 1031-1036 (2016).
- 326 22. Miller, A.H. & Raison, C.L. The role of inflammation in depression: from evolutionary  
327 imperative to modern treatment target. *Nat Rev Immunol* **16**, 22-34 (2016).
- 328 23. Klok, M., Gotestam, K.G. & Mykletun, A. Factors accounting for the association between  
329 anxiety and depression, and eczema: the Hordaland health study (HUSK). *BMC Dermatology*  
330 **10**, 3 (2010).
- 331 24. Millan, M.J. *et al.* Cognitive dysfunction in psychiatric disorders: characteristics, causes and  
332 the quest for improved therapy. *Nat Rev Drug Discov* **11**, 141-168 (2012).
- 333 25. Dere, E., Pause, B.M. & Pietrowsky, R. Emotion and episodic memory in neuropsychiatric  
334 disorders. *Behavioural Brain Research* **215**, 162-171 (2010).
- 335 26. Diniz, B.S., Butters, M.A., Albert, S.M., Dew, M.A. & Reynolds, C.F. Late-life depression and  
336 risk of vascular dementia and Alzheimer's disease: systematic review and meta-analysis of  
337 community-based cohort studies. *The British Journal of Psychiatry* **202**, 329-335 (2013).
- 338 27. Norton, S., Matthews, F.E., Barnes, D.E., Yaffe, K. & Brayne, C. Potential for primary  
339 prevention of Alzheimer's disease: an analysis of population-based data. *The Lancet*  
340 *Neurology* **13**, 788-794 (2014).
- 341 28. Smith, D.J. *et al.* Genome-wide analysis of over 106 000 individuals identifies 9 neuroticism-  
342 associated loci. *Molecular Psychiatry* **21**, 749-757 (2016).
- 343 29. First, M.B., Spitzer, R.L., Gibbon Miriam. & Williams, J.B.W. Structured Clinical Interview for  
344 DSM-IV-TR Axis I Disorders, Research Version, Patient Edition. (SCID-I/P) (2002).
- 345 30. Matcham, F., Rayner, L., Steer, S. & Hotopf, M. The prevalence of depression in rheumatoid  
346 arthritis: a systematic review and meta-analysis. *Rheumatology* **52**, 2136-2148 (2013).
- 347 31. Rathbun, A.M., Harrold, L.R. & Reed, G.W. Temporal associations between the different  
348 domains of rheumatoid arthritis disease activity and the onset of patient-reported  
349 depressive symptoms. *Clinical Rheumatology* **34**, 653-663 (2015).

- 350 32. Tillmann, T., Krishnadas, R., Cavanagh, J. & Petrides, K. Possible rheumatoid arthritis  
351 subtypes in terms of rheumatoid factor, depression, diagnostic delay and emotional  
352 expression: an exploratory case-control study. *Arthritis Research & Therapy* **15**, R45 (2013).
- 353 33. Deaton, A. & Arora, R. Life at the top: The benefits of height. *Economics & Human Biology* **7**,  
354 133-136 (2009).
- 355 34. Carey, M. *et al.* Prevalence of comorbid depression and obesity in general practice: a cross-  
356 sectional survey. *British Journal of General Practice* **64**, e122-e127 (2014).
- 357 35. Rustad, J.K., Musselman, D.L. & Nemeroff, C.B. The relationship of depression and diabetes:  
358 Pathophysiological and treatment implications. *Psychoneuroendocrinology* **36**, 1276-1286  
359 (2011).
- 360 36. Das, S. *et al.* Next-generation genotype imputation service and methods. *Nature Genetics* **48**,  
361 1284-1287 (2016).
- 362 37. Delaneau, O., Zagury, J.-F. & Marchini, J. Improved whole-chromosome phasing for disease  
363 and population genetic studies. *Nature Methods* **10**, 5-6 (2013).
- 364 38. McCarthy, S. *et al.* A reference panel of 64,976 haplotypes for genotype imputation. *Nature*  
365 *Genetics* **48**, 1279-1283 (2016).
- 366 39. Nagy, R. *et al.* Exploration of haplotype research consortium imputation for genome-wide  
367 association studies in 20,032 Generation Scotland participants. *Genome Medicine* **9**, 23  
368 (2017).
- 369 40. Fernandez-Pujals, A.M. *et al.* Epidemiology and heritability of major depressive disorder,  
370 stratified by age of onset, sex, and illness course in generation scotland: scottish family  
371 health study (GS:SFHS). *PLoS ONE* **10**, e0142197 (2015).
- 372 41. Information Services Division. SMR Data Manual. ([http://www.ndc.scot.nhs.uk/Data-](http://www.ndc.scot.nhs.uk/Data-Dictionary/SMR-Datasets)  
373 [Dictionary/SMR-Datasets](http://www.ndc.scot.nhs.uk/Data-Dictionary/SMR-Datasets), 2016).
- 374 42. Yang, J., Lee, S.H., Goddard, M.E. & Visscher, P.M. GCTA: A tool for genome-wide complex  
375 trait analysis. *The American Journal of Human Genetics* **88**, 76-82 (2011).
- 376 43. Amador, C. *et al.* Recent genomic heritage in Scotland. *BMC Genomics* **16**, 1-17 (2015).
- 377 44. Marchini, J. UK Biobank phasing and imputation documentation. Version 1.2.  
378 ([http://biobank.ctsu.ox.ac.uk/crystal/docs/impute\\_ukb\\_v1.pdf](http://biobank.ctsu.ox.ac.uk/crystal/docs/impute_ukb_v1.pdf), 2015).
- 379 45. UK Biobank. Genotype imputation and genetic association studies using UK Biobank data.  
380 <http://biobank.ctsu.ox.ac.uk/crystal/refer.cgi?id=157020> (2015).
- 381 46. UK Biobank. Genotyping and quality control for UK Biobank.  
382 <http://biobank.ctsu.ox.ac.uk/crystal/refer.cgi?id=155580> (2015).
- 383 47. O'Connell, J. *et al.* Haplotype estimation for biobank-scale data sets. *Nature Genetics* **48**,  
384 817-820 (2016).
- 385 48. Huang, J. *et al.* Improved imputation of low-frequency and rare variants using the UK10K  
386 haplotype reference panel. *Nature Communications* **6**, 8111 (2015).
- 387 49. Howie, B., Marchini, J. & Stephens, M. Genotype imputation with thousands of genomes.  
388 *G3: Genes/Genomes/Genetics* **1**, 457-470 (2011).
- 389 50. Ripke, S. GWAS genotypic overlap test without sharing genotypes.  
390 [https://personal.broadinstitute.org/sripke/share\\_links/checksums\\_download/readme\\_0415](https://personal.broadinstitute.org/sripke/share_links/checksums_download/readme_0415)  
391 [b.txt](https://personal.broadinstitute.org/sripke/share_links/checksums_download/readme_0415) (2014).
- 392 51. Smith, D.J. *et al.* Prevalence and characteristics of probable major depression and bipolar  
393 disorder within UK Biobank: cross-sectional study of 172,751 participants. *PLoS ONE* **8**,  
394 e75362 (2013).
- 395 52. Chang, C.C. *et al.* Second-generation PLINK: rising to the challenge of larger and richer  
396 datasets. *GigaScience* **4**, 7 (2015).
- 397 53. UK Biobank. Genetic principal components.  
398 <http://biobank.ctsu.ox.ac.uk/crystal/field.cgi?id=22009> (2015).

399
